# Supplementary material
Source: Springer Nature journal article supplement (https://www.springermedizin.de/resource/supplementary/12880_2013_235_MOESM3_ESM.docx/9450298)
Supplement: MOESM3 [file 9450298]

**Table 3a. Severity of IR and severity of BTR to iodinated contrast media.**

| Initial Reaction (IR; n=146) | | Breakthrough Reaction (BTR) | | |
| --- | --- | --- | --- | --- |
| Mild | Moderate | Severe |
| Iodine | Mild (n=121) | 7 | 1 | 0 |
| Moderate (n=7) | 0 | 0 | 1 |
| Gadolinium | Mild (n=4) | 0 | 0 | 0 |
| Moderate (n=2) | 0 | 0 | 0 |
| Others* (n=12) | | 0 | 0 | 0 |

* Suspected delayed adverse reactions to iodinated contrast media (n=12).
